# Supplementary material for: Characterization of Growth-Promoting Activities of Consortia of Chlorpyrifos Mineralizing Endophytic Bacteria Naturally Harboring in Rice Plants—A Potential Bio-Stimulant to Develop a Safe and Sustainable Agriculture
Source: MDPI journal article supplement (doi:10.3390/microorganisms11071821), 2023-07-16
Supplement: s1 [file s1]

**Table S1: Biodegradations profile of chlorpyrifos (1 gm/100 mL) in minimal broth medium after treated with endophytic bacterial synthetic Consortium-2.**

| Similarity of hit | Spectrum | Soft ionization (SI) | Spectrum | Molecular weight (Da) | Molecular form  | Molecular structure                                                                   |
|-------------------|----------|----------------------|----------|-----------------------|-----------------|---------------------------------------------------------------------------------------|
| 1                 | 78       | 2921                 | 88       | 2                     | Chlorpyrifos    | 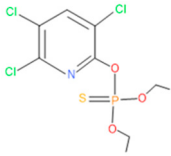   |
| 2                 | 70       | 2921                 | 88       | 2                     | Chlorpyrifos    |    |
| 3                 | 67       | 2921                 | 88       | 2                     | Chlorpyrifos    |    |
| 4                 | 67       | 2921                 | 88       | 2                     | Chlorpyrifos    |   |
| 5                 | 65       | 2921                 | 88       | 2                     | Chlorpyrifos    |  |
| 6                 | 59       | 2588                 | 3        | 6                     | Phorate sulfone |  |
| 7                 | 59       | 2588                 | 3        | 6                     | Phorate sulfone |  |
| 8                 | 58       | 2588                 | 4        | 7                     | Phorate sulfone |  |
| 9                 | 58       | 2588                 | 3        | 6                     | Phorate sulfone |  |

|    |    |       |    |   |                                   |                                                                                       |
|----|----|-------|----|---|-----------------------------------|---------------------------------------------------------------------------------------|
| 10 | 58 | 2921  | 88 | 2 | Chlorpyrifos                      | 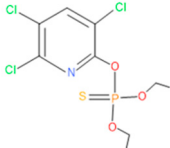   |
| 11 | 57 | 2588  | 4  | 7 | Phorate sulfone                   |    |
| 12 | 56 | 5598  | 13 | 0 | Chloropyriphos-methyl             |    |
| 13 | 55 | 2921  | 88 | 2 | Chlorpyrifos                      |    |
| 14 | 55 | 6515  | 38 | 4 | 2-Hydroxy-3,5,6-trichloropyridine |   |
| 15 | 55 | 2588  | 4  | 7 | Phorate sulfone                   |  |
| 16 | 55 | 6515  | 38 | 4 | 2-Hydroxy-3,5,6-trichloropyridine |  |
| 17 | 54 | 17297 | 40 | 4 | Carbofenothion sulfoxide          |  |
| 18 | 53 | 2588  | 4  | 7 | Phorate sulfone                   |  |
| 19 | 52 | 2497  | 7  | 6 | Oxydisulfoton                     |  |

|    |    |       |    |   |                                                                                  |                                                                                      |
|----|----|-------|----|---|----------------------------------------------------------------------------------|--------------------------------------------------------------------------------------|
| 20 | 52 | 16947 | 69 | 6 | Carbonochloridic acid                                                            | 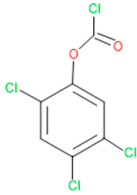  |
| 21 | 51 | 4891  | 54 | 7 | Thionodemeton sulfone                                                            |   |
| 22 | 51 | 2021  | 58 | 1 | dl-2-. beta. -Thienyl-.<br>alpha. -alanine                                       |   |
| 23 | 50 | 5598  | 15 | 2 | Phosphoric acid, diethyl<br>3,5,6-trichloro-2-pyridyl<br>ester/Chlorpyrifos Oxon |   |
| 24 | 50 | 683   | 8  | 9 | Diethyl<br>methanephosphonate                                                    |   |
| 25 | 50 | 683   | 8  | 9 | Diethyl<br>methanephosphonate                                                    |  |

**Table S2: Biodegradations profile of chlorpyrifos (1 gm/100 mL) in minimal broth medium after treated with endophytic bacterial synthetic Consortium-4.**

| Similarity of hit | search Spectrum | Soft ionization (SI) | Spectrum | Molecular weight (Da) | Molecular form    | Molecular structure                                                                   |
|-------------------|-----------------|----------------------|----------|-----------------------|-------------------|---------------------------------------------------------------------------------------|
| 1                 | 78              | 2921                 | 88       | 2                     | Chlorpyrifos      | 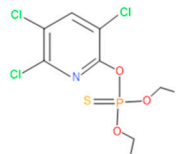   |
| 2                 | 70              | 2921                 | 88       | 2                     | Chlorpyrifos      |    |
| 3                 | 67              | 2921                 | 88       | 2                     | Chlorpyrifos      |    |
| 4                 | 67              | 2921                 | 88       | 2                     | Chlorpyrifos      |    |
| 5                 | 65              | 2921                 | 88       | 2                     | Chlorpyrifos      |   |
| 6                 | 59              | 2921                 | 88       | 2                     | Chlorpyrifos      |  |
| 7                 | 59              | 2588                 | 3        | 6                     | Phorate sulfoxide |  |
| 8                 | 58              | 2588                 | 3        | 6                     | Phorate sulfoxide |  |
| 9                 | 58              | 2588                 | 4        | 7                     | Phorate sulfone   |  |
| 10                | 58              | 2588                 | 3        | 6                     | Phorate sulfoxide |  |

|    |    |       |    |   |                                   |                                                                                       |
|----|----|-------|----|---|-----------------------------------|---------------------------------------------------------------------------------------|
| 11 | 57 | 2588  | 4  | 7 | Phorate sulfone                   |    |
| 12 | 56 | 2921  | 88 | 2 | Chlorpyrifos                      |    |
| 13 | 55 | 2588  | 4  | 7 | Phorate sulfone                   |    |
| 14 | 55 | 6515  | 38 | 4 | 2-Hydroxy-3,5,6-trichloropyridine |    |
| 15 | 55 | 6515  | 38 | 4 | 2-Hydroxy-3,5,6-trichloropyridine |    |
| 16 | 55 | 2588  | 4  | 7 | Phorate sulfone                   |    |
| 17 | 54 | 5598  | 13 | 0 | Chloropyriphos-methyl             |  |
| 18 | 53 | 16947 | 69 | 6 | Carbonochloridic acid             |  |
| 19 | 52 | 5598  | 15 | 2 | Phosphoric acid                   |  |
| 20 | 52 | 17297 | 40 | 4 | Carbofenothion sulfoxide          |  |

|    |    |       |    |   |                        |                                                                                     |
|----|----|-------|----|---|------------------------|-------------------------------------------------------------------------------------|
| 21 | 51 | 4891  | 54 | 7 | Thionodemeton sulfone  | 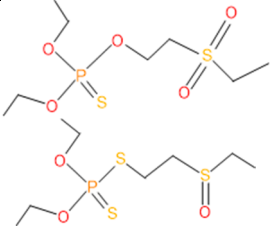 |
| 22 | 51 | 2497  | 7  | 6 | Oxydisulfoton          |  |
| 23 | 50 | 16270 | 87 | 4 | Phosphorodithioic acid |  |
| 24 | 50 | 5598  | 13 | 0 | Chloropyriphos-methyl  |  |
| 25 | 50 | 4861  | 59 | 0 | Thiophene,             |  |

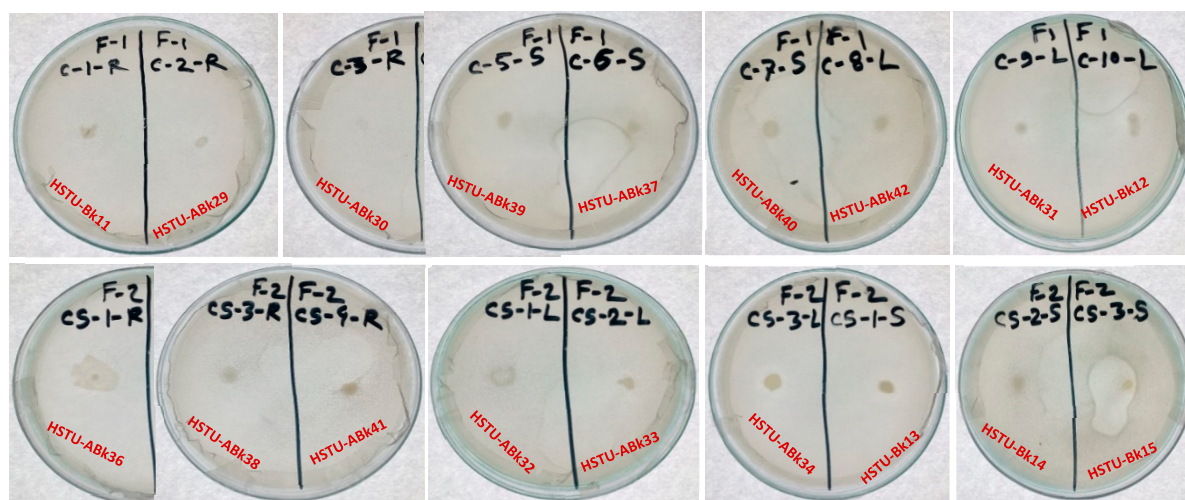

Figure S1: phosphate solubilizing activities of the chlorpyrifos mineralizing endophytic bacteria



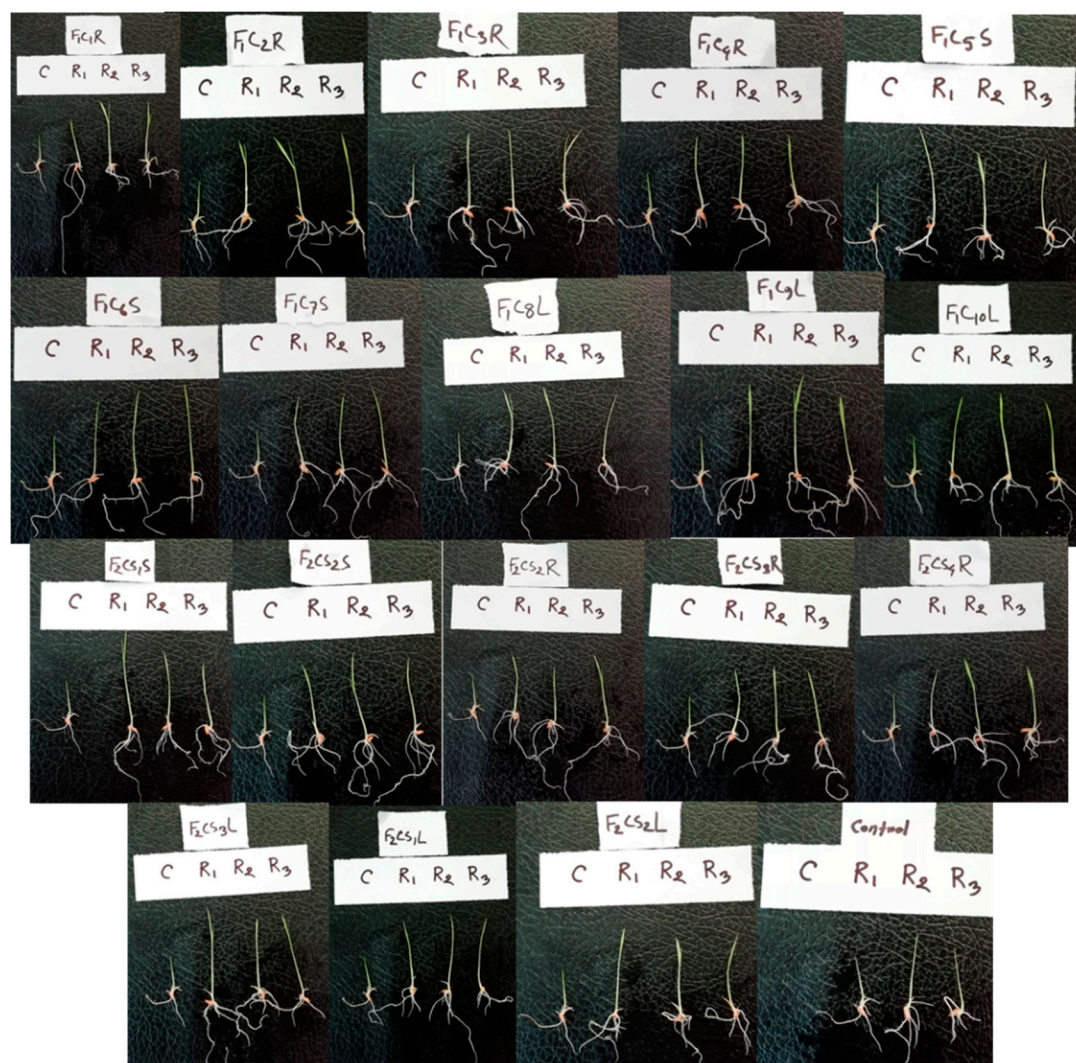

(a)

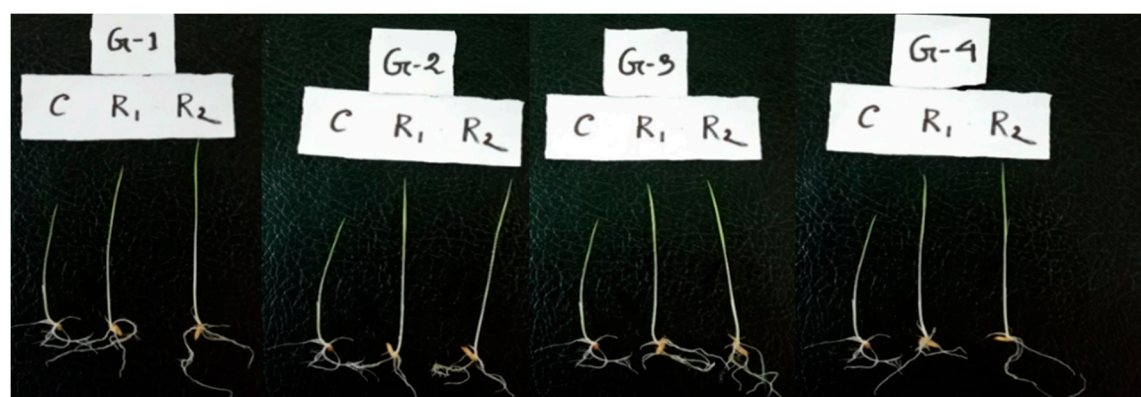

(b)

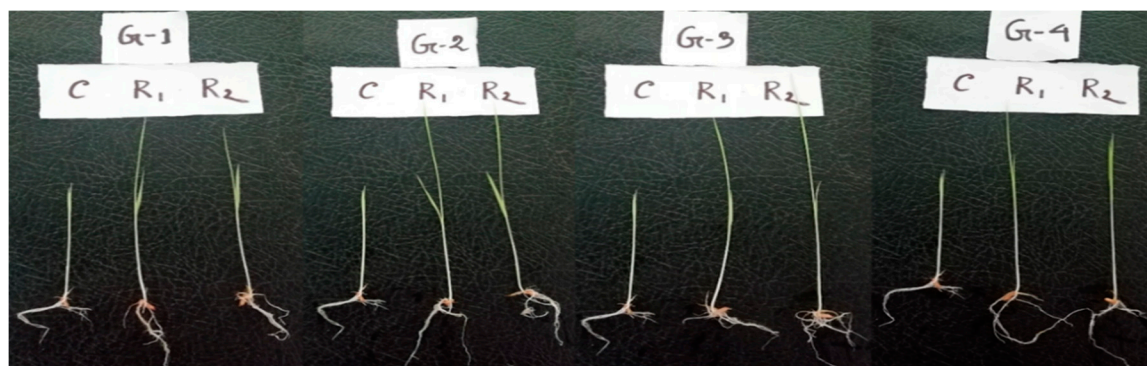

(c)

Figure S2: (a) Germinated rice plants after 8 days of endophytic bacterial treatment. (C) control, (R) replica; (b) Effect of endophytic consortium on seedling and growth parameter after 8 days. (C) control, (R) replica and (G) consortia; (c) Effect of endophytic consortium on Seedling and growth parameter after 12 days of treatment. (C) control, (R) replica and (G) consortia.



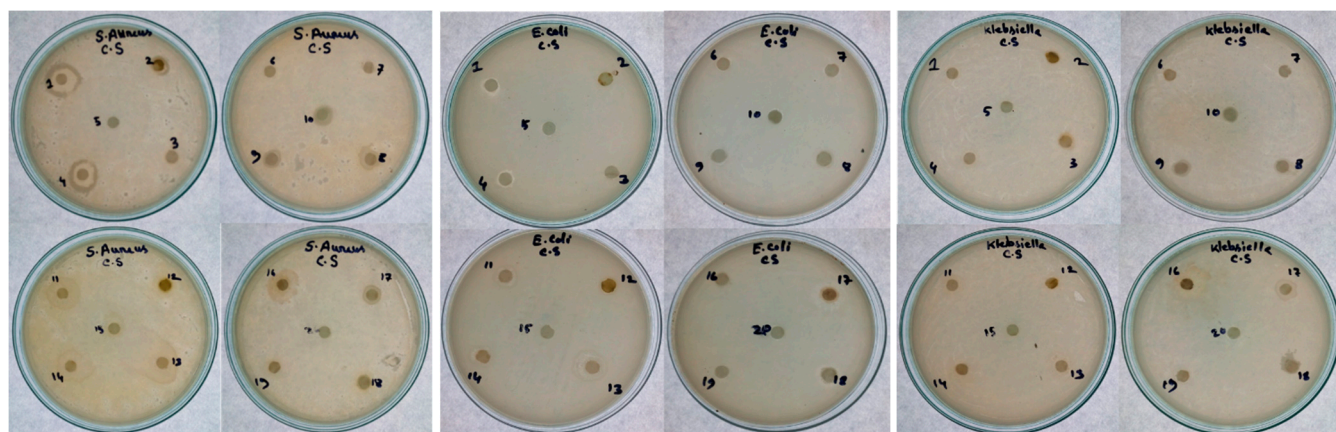

(a)

(b)

(c)

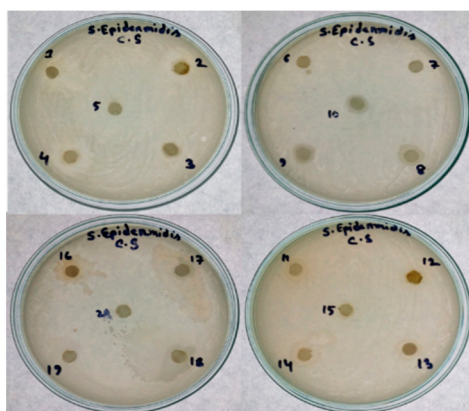

(d)

Figure S3: (a) Antibacterial activity of endophytic bacteria against multidrug-resistant human pathogenic bacteria *S. Aureus* after 32 h. (b) Antibacterial activity of endophytic bacteria against multidrug-resistant human pathogenic bacteria *E. Coli* after 32 h. (c) Antibacterial activity of endophytic bacteria against multidrug-resistant human pathogenic bacteria *Klebsiella* sp. after 32 h. (d) Antibacterial activity of endophytic bacteria against multidrug-resistant human pathogenic bacteria *S. epidermidis* after 32 h.
